# Supplementary material for: The Dedicated Chaperone Acl4 Escorts Ribosomal Protein Rpl4 to Its Nuclear Pre-60S Assembly Site
Source: PubMed Central journal article supplement (PMC4598080; doi:10.1371/journal.pgen.1005565), 2015-10-08
Supplement: pgen.1005565.s001.pdf [file pgen.1005565.s001.pdf]

**S1 Table. Yeast strains used in this study.**

| Name     |             | Relevant genotype                                                                                            | Source                      |
|----------|-------------|--------------------------------------------------------------------------------------------------------------|-----------------------------|
| YBP15    | <i>MATa</i> | <i>rpl4a::natNT2 rpl4b::HIS3MX4 ade3::kanMX4</i><br><i>pHT4467Δ-RPL4A</i>                                    | This study                  |
| YBP1     | <i>MATa</i> | <i>rpl4a::natNT2</i>                                                                                         | This study                  |
| YBP9     | <i>MATa</i> | <i>rpl4b::natNT2</i>                                                                                         | This study                  |
| YKL681   | <i>MATa</i> | <i>ACL4-TAP::natNT2</i>                                                                                      | This study                  |
| YKL689   | <i>MATα</i> | <i>ACL4-TAP::HIS3MX4</i>                                                                                     | This study                  |
| YKL693   | <i>MATα</i> | <i>ACL4-GFP::HIS3MX4</i>                                                                                     | This study                  |
| YKL757   | <i>MATa</i> | <i>ACL4-GFP::HIS3MX4 NOP58-yEmCherry::natNT2</i><br><i>ade3::kanMX4</i>                                      | This study                  |
| YKL701   | <i>MATa</i> | <i>acl4::HIS3MX4</i>                                                                                         | This study                  |
| YKL703   | <i>MATα</i> | <i>acl4::natNT2</i>                                                                                          | This study                  |
| YBP92    | <i>MATα</i> | <i>ACL4 RPL4A RPL4B</i>                                                                                      | This study                  |
| YBP91    | <i>MATa</i> | <i>acl4::natNT2 RPL4A RPL4B</i>                                                                              | This study                  |
| YBP97    | <i>MATa</i> | <i>ACL4 rpl4A::HIS3MX4 RPL4B</i>                                                                             | This study                  |
| YBP98    | <i>MATa</i> | <i>acl4::natNT2 rpl4A::HIS3MX4 RPL4B</i>                                                                     | This study                  |
| YBP89    | <i>MATα</i> | <i>ACL4 RPL4A rpl4B::HIS3MX4</i>                                                                             | This study                  |
| YBP90    | <i>MATa</i> | <i>acl4::natNT2 RPL4A rpl4B::HIS3MX4</i>                                                                     | This study                  |
| YKL500   | <i>MATα</i> | <i>NOP58-yEmCherry::natNT2 ade3::kanMX4</i>                                                                  | This study                  |
| YDK11-5A | <i>MATα</i> | <i>ade3::kanMX4</i>                                                                                          | Kressler <i>et al.</i> 1999 |
| Y4047    | <i>MATa</i> | <i>SYO1-FTpA::HIS3MX4</i>                                                                                    | Kressler <i>et al.</i> 2012 |
| Y4252    | <i>MATα</i> | <i>kap104::natNT2 ade3::kanMX4 pRS316-KAP104</i>                                                             | This study                  |
| PJ69-4A  | <i>MATa</i> | <i>trp1-901 leu2-3,112 ura3-52 his3-200 gal4Δ gal80Δ</i><br><i>LYS2::GAL1-HIS3 GAL2-ADE2 met2::GAL7-lacZ</i> | James <i>et al.</i> 1996    |

Strains used in this study were derived from W303 (*MATa/MATα ade2-1/ade2-1 his3-11,15/his3-11,15 leu2-3,112/leu2-3,112 trp1-1/trp1-1 ura3-1/ura3-1 can1-100/can1-100*). For yeast two-hybrid interaction assays, strain PJ69-4A was used.
