# Supplementary material for: The Dedicated Chaperone Acl4 Escorts Ribosomal Protein Rpl4 to Its Nuclear Pre-60S Assembly Site
Source: PubMed Central journal article supplement (PMC4598080; doi:10.1371/journal.pgen.1005565), 2015-10-08
Supplement: pgen.1005565.s002.pdf [file pgen.1005565.s002.pdf]

**S2 Table. *S. cerevisiae* and *E. coli* expression plasmids used in this study.\***

| Name                                                                | Relevant information                                                                | Source                       |
|---------------------------------------------------------------------|-------------------------------------------------------------------------------------|------------------------------|
| YCplac111- <i>PRPL4A-RPL4A</i>                                      | CEN, <i>LEU2</i> , <i>PRPL4A</i> , <i>TADH1</i>                                     | This study                   |
| pHT4467Δ- <i>RPL4A</i> -stop                                        | CEN6 (instable), <i>URA3</i> , <i>ADE3</i> , <i>PRPL4A</i> , <i>TADH1</i>           | This study                   |
| pyEGFPGAC111- <i>RPL4A</i>                                          | CEN, <i>LEU2</i> , <i>PRPL4A</i> , <i>TADH1</i>                                     | This study                   |
| pyEGFPN111- <i>RPL4A</i>                                            | C-terminal (GA) <sub>5</sub> -yEGFP                                                 |                              |
| pADH111- <i>RPL4A</i> -(GA) <sub>5</sub> -3xyEGFP                   | CEN, <i>LEU2</i> , <i>PRPL4A</i> , <i>TADH1</i> , N-terminal yEGFP                  | This study                   |
| pNTAPF111- <i>RPL4A</i>                                             | CEN, <i>LEU2</i> , <i>PADH1</i> , <i>TADH1</i>                                      | This study                   |
|                                                                     | C-terminal (GA) <sub>5</sub> -3xyEGFP                                               |                              |
|                                                                     | CEN, <i>LEU2</i> , <i>PRPL4A</i> , <i>TADH1</i>                                     | This study                   |
|                                                                     | N-terminal protA-TEV-CBP-Flag tag                                                   |                              |
| pGAL111- <i>RPL4A</i>                                               | CEN, <i>LEU2</i> , <i>PGAL1-10</i> , <i>TADH1</i>                                   | This study                   |
| pGAL111-HA- <i>RPL4A</i>                                            | CEN, <i>LEU2</i> , <i>PGAL1-10</i> , <i>TADH1</i> , N-terminal 2xHA                 | This study                   |
| pHAN111- <i>RPL4A</i>                                               | CEN, <i>LEU2</i> , <i>PRPL4A</i> , <i>TADH1</i> , N-terminal 2xHA                   | This study                   |
| pCUP111- <i>RPL4A</i> -2xHA                                         | CEN, <i>LEU2</i> , <i>PCUP1</i> , <i>TADH1</i> , C-terminal 2xHA                    | This study                   |
| pGAG4BDC22- <i>RPL4A</i>                                            | CEN, <i>TRP1</i> , <i>PADH1</i> , <i>TADH1</i> , C-terminal (GA) <sub>5</sub> -G4BD | This study                   |
| pG4ADHAN111- <i>RRB1</i>                                            | CEN, <i>LEU2</i> , <i>PADH1</i> , <i>TADH1</i> , N-terminal G4AD                    | This study                   |
| YCplac111- <i>ACL4</i>                                              | CEN, <i>LEU2</i> , <i>PACL4</i> , <i>TADH1</i>                                      | This study                   |
| YEplac112- <i>ACL4</i>                                              | 2μ, <i>TRP1</i> , <i>PACL4</i> , <i>TADH1</i>                                       | This study                   |
| pADH22- <i>ACL4</i>                                                 | CEN, <i>TRP1</i> , <i>PADH1</i> , <i>TADH1</i>                                      | This study                   |
| pGAL22- <i>ACL4</i>                                                 | CEN, <i>TRP1</i> , <i>PGAL1-10</i> , <i>TADH1</i>                                   | This study                   |
| pGAL111- <i>ACL4</i>                                                | CEN, <i>LEU2</i> , <i>PGAL1-10</i> , <i>TADH1</i>                                   | This study                   |
| pGAL181- <i>ACL4</i>                                                | 2μ, <i>LEU2</i> , <i>PGAL1-10</i> , <i>TADH1</i>                                    | This study                   |
| pGAG4ADC111- <i>ACL4</i>                                            | CEN, <i>LEU2</i> , <i>PADH1</i> , <i>TADH1</i> , C-terminal (GA) <sub>5</sub> -G4AD | This study                   |
| pADH111- <i>ctACL4</i>                                              | CEN, <i>LEU2</i> , <i>PADH1</i> , <i>TADH1</i>                                      | This study                   |
| YCplac22- <i>KAP104</i>                                             | CEN, <i>TRP1</i> , <i>PKAP104</i> , <i>TKAP104</i>                                  | This study                   |
| pRS314- <i>kap104-16</i>                                            | CEN, <i>TRP1</i> , <i>PKAP104</i> , <i>TKAP104</i>                                  | Aitchison <i>et al.</i> 1996 |
| pADH111- <i>NAB2(216-242)</i> -(GA) <sub>5</sub> -3xyEGFP           | CEN, <i>LEU2</i> , <i>PADH1</i> , <i>TADH1</i>                                      | This study                   |
|                                                                     | C-terminal (GA) <sub>5</sub> -3xyEGFP                                               |                              |
| pFA6a-HIS3MX4                                                       | for genomic deletion disruption                                                     | Longtine <i>et al.</i> 1998  |
| pFA6a-natNT2                                                        | for genomic deletion disruption                                                     | Janke <i>et al.</i> 2004     |
| pFA6a-GFP-HIS3MX4                                                   | GFP(S65T), <i>TADH1</i> , for genomic C-terminal tagging                            | Longtine <i>et al.</i> 1998  |
| pFA6a-TAP-HIS3MX4                                                   | TAP, <i>TADH1</i> ; for genomic C-terminal tagging                                  | Pausch <i>et al.</i> 2015    |
| pFA6a-TAP- <i>TCYCI</i> -natNT2                                     | TAP, <i>TCYCI</i> ; for genomic C-terminal tagging                                  | Kressler <i>et al.</i> 2008  |
| pFA6a-yEmCherry-natNT2                                              | yEmCherry; for genomic C-terminal tagging                                           | This study                   |
| pETDuet-1/ <i>RPL4A</i> -(His) <sub>6</sub> - <i>ACL4</i> -Flag     | amp <sup>r</sup> , T7 promoter/ <i>lac</i> operator                                 | This study                   |
| pETDuet-1/ <i>ctRPL4A</i> -(His) <sub>6</sub> - <i>ctACL4</i> -Flag | amp <sup>r</sup> , T7 promoter/ <i>lac</i> operator                                 | This study                   |

\*For simplicity, only the plasmids containing the respective wild-type genes are listed. The mutant variants thereof used in this study were cloned into the listed plasmids. P and T denote promoter and terminator, respectively.
