# Supplementary material for: The Dedicated Chaperone Acl4 Escorts Ribosomal Protein Rpl4 to Its Nuclear Pre-60S Assembly Site
Source: PubMed Central journal article supplement (PMC4598080; doi:10.1371/journal.pgen.1005565), 2015-10-08

**Figure S11**

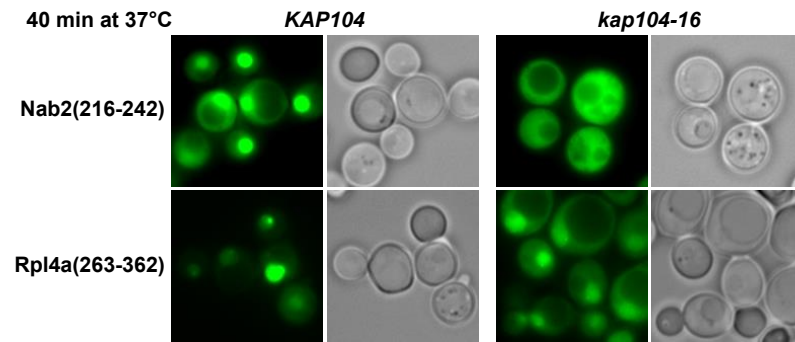

Supplement: pgen.1005565.s013.pdf [file pgen.1005565.s013.pdf]
